# Supplementary material
Source: Springer Nature journal article supplement (https://www.springermedizin.de/resource/supplementary/13256_2010_1213_MOESM1_ESM.pdf/9647254)

8885

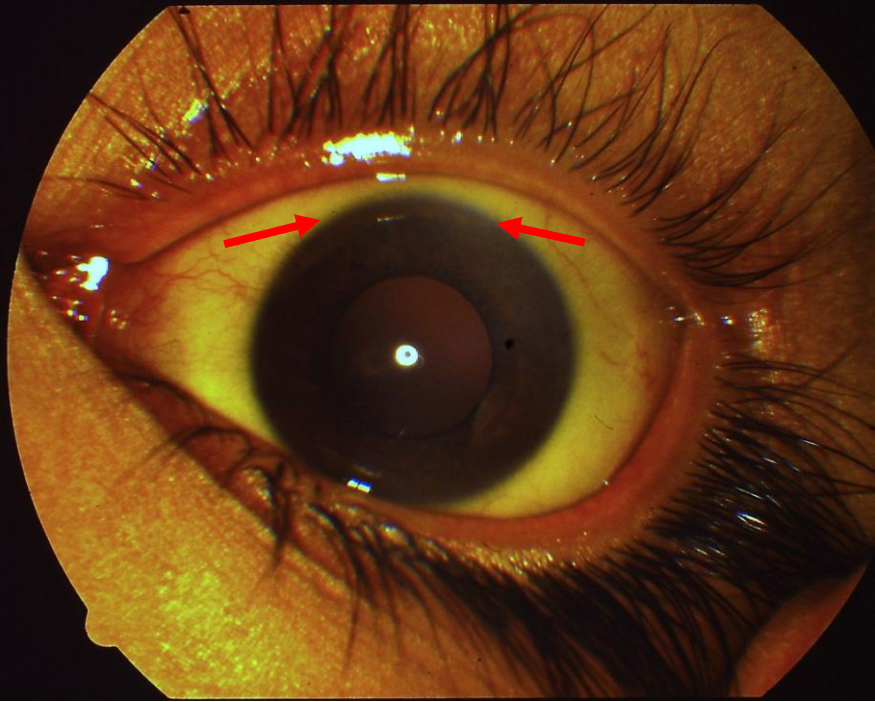

Supplement: MOESM1 [file 9647254]
